# Supplementary material for: Characterisation of the supramolecular structure of malonamides by application of pulsed field gradients in NMR spectroscopy
Source: Royal Society of Chemistry journal article supplement (doi:10.1039/b707897h), 2007-01-01
Supplement: b707897h.pdf [file b707897h.pdf]

## Characterisation of the supramolecular structure of malonamides by application of pulsed field gradients in NMR spectroscopy

Hélène Dozol <sup>\*a,b</sup> and Claude Berthon <sup>a</sup>

<sup>a</sup> CEA Marcoule, DEN/DRCP/SCPS/LCAM, BP17171, 30207 Bagnols sur Cèze, France. Fax: (+33)466796325; Tel: (+33)466796569; E-mail: [claude.berthon@cea.fr](mailto:claude.berthon@cea.fr)

<sup>b</sup> *Present address*: Department of Chemical Engineering, University of California, Santa Barbara, California, 93106, USA. Fax: 1-805-893-4731; Tel: 1-805-893-8596; E-mail: [dozol@engineering.ucsb.edu](mailto:dozol@engineering.ucsb.edu)

**Supplementary information Figure S1:** Self-diffusion coefficients vs. the total malonamide concentration for the DMDBTDMA/C<sub>12</sub>H<sub>26</sub>/H<sub>2</sub>O (A), DMDBTDMA/C<sub>12</sub>H<sub>26</sub> (B), DMDBTDMA/C<sub>12</sub>D<sub>26</sub>/H<sub>2</sub>O (C) and DMDBTDMA/C<sub>12</sub>D<sub>26</sub> (D) systems

**Supplementary information Figure S2:** Self-diffusion coefficients vs. the total malonamide concentration for the DMDBPMA/C<sub>12</sub>H<sub>26</sub>/H<sub>2</sub>O (for the upper (A) and lower (B) phase), DMDBPMA/C<sub>12</sub>D<sub>26</sub>/H<sub>2</sub>O (for the upper (C) and lower (D) phase) and DMDBPMA/C<sub>12</sub>D<sub>26</sub> (E) systems

**Supplementary information Figure S3:** Experimental and calculated (for n=5 to 9) self-diffusion coefficients vs. the total malonamide concentration for the DMDBPMA/C<sub>12</sub>H<sub>26</sub>/H<sub>2</sub>O system

**Supplementary information Figure S4:** Experimental and calculated (for n=5 to 9) self-diffusion coefficients vs. the total malonamide concentration for the DMDBPMA/C<sub>12</sub>D<sub>26</sub>/H<sub>2</sub>O system

**Supplementary information Figure S5:** Experimental and calculated (for n=5 to 9) self-diffusion coefficients vs. the total malonamide concentration for the DMDBPMA/C<sub>12</sub>D<sub>26</sub> system

**Supplementary information Figure S6:** Experimental and calculated (for n=5 to 9) self-diffusion coefficients vs. the total malonamide concentration for the DMDBTDMA/C<sub>12</sub>D<sub>26</sub>/H<sub>2</sub>O system

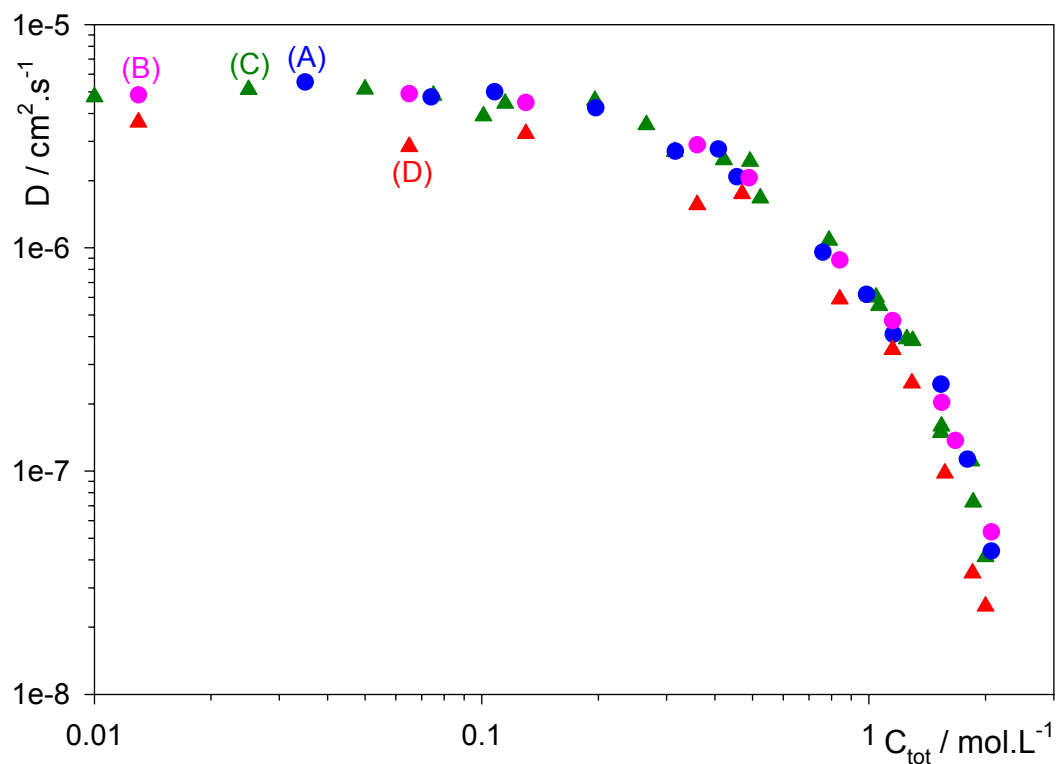

**Fig. S1** Self-diffusion coefficients vs. the total malonamide concentration for the DMBDMDMA/ $\text{C}_{12}\text{H}_{26}/\text{H}_2\text{O}$  (A), DMBDMDMA/ $\text{C}_{12}\text{H}_{26}$  (B), DMBDMDMA/ $\text{C}_{12}\text{D}_{26}/\text{H}_2\text{O}$  (C) and DMBDMDMA/ $\text{C}_{12}\text{D}_{26}$  (D) systems

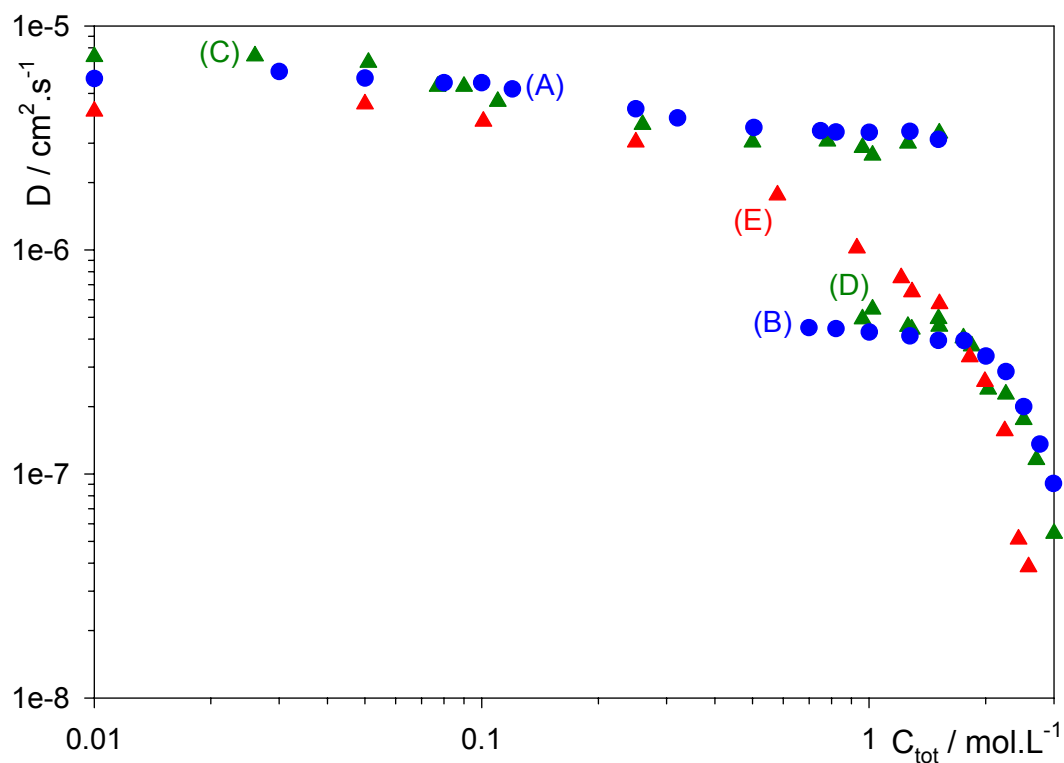

**Fig. S2** Self-diffusion coefficients vs. the total malonamide concentration for the DMBBPMA/ $\text{C}_{12}\text{H}_{26}/\text{H}_2\text{O}$  (for the upper (A) and lower (B) phase), DMBBPMA/ $\text{C}_{12}\text{D}_{26}/\text{H}_2\text{O}$  (for the upper (C) and lower (D) phase) and DMBBPMA/ $\text{C}_{12}\text{D}_{26}$  (E) systems

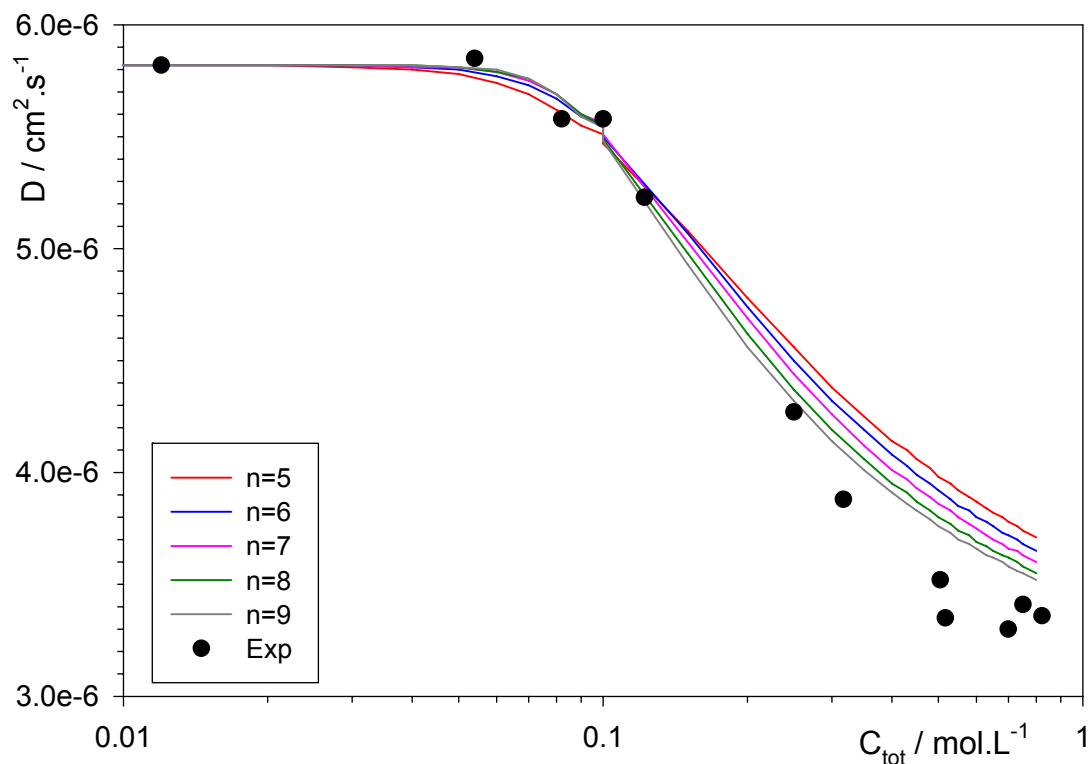

**Fig. S3** Experimental and calculated (for  $n=5$  to  $9$ ) self- diffusion coefficients vs. the total malonamide concentration for the DMDBPMA/C<sub>12</sub>H<sub>26</sub>/H<sub>2</sub>O system

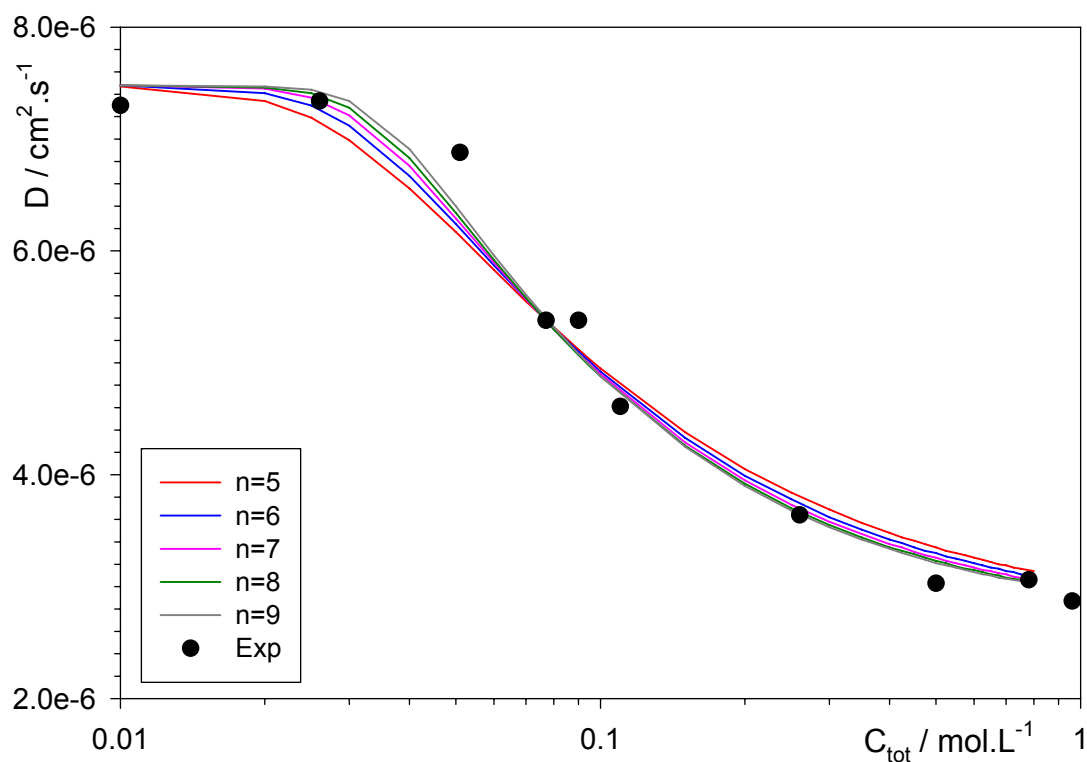

**Fig. S4** Experimental and calculated (for  $n=5$  to  $9$ ) self- diffusion coefficients vs. the total malonamide concentration for the DMDBPMA/C<sub>12</sub>D<sub>26</sub>/H<sub>2</sub>O system

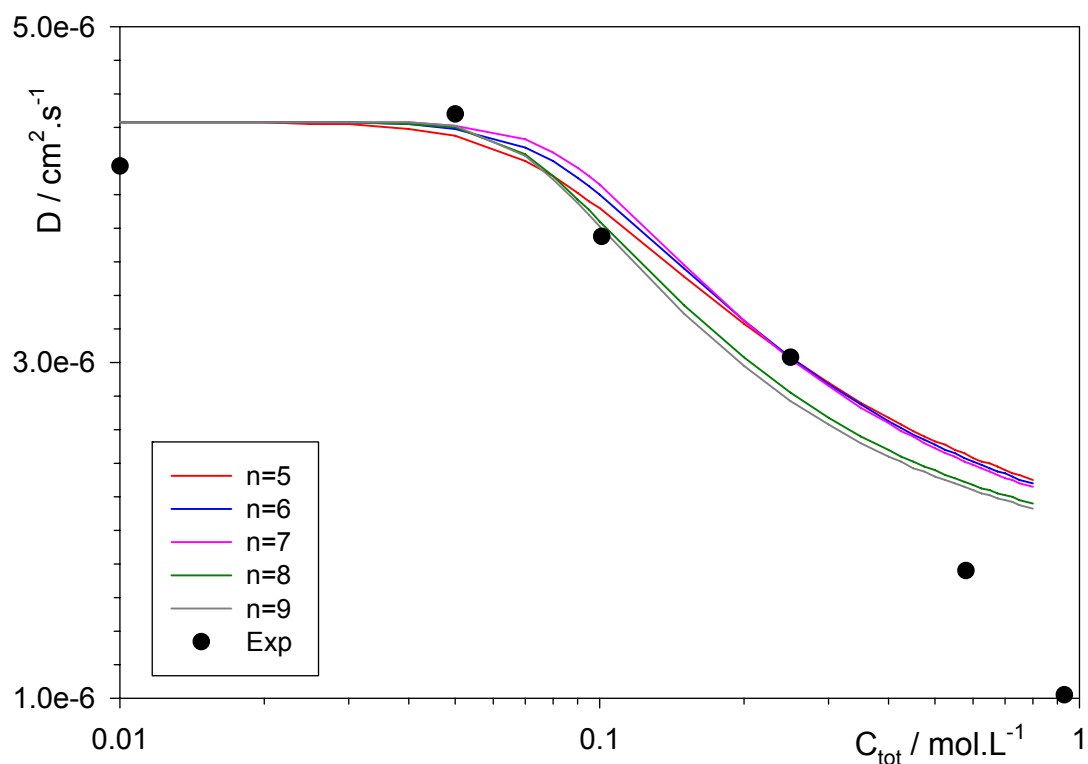

**Fig. S5** Experimental and calculated (for  $n=5$  to  $9$ ) self- diffusion coefficients vs. the total malonamide concentration for the DMDBPMA/ $C_{12}D_{26}$  system

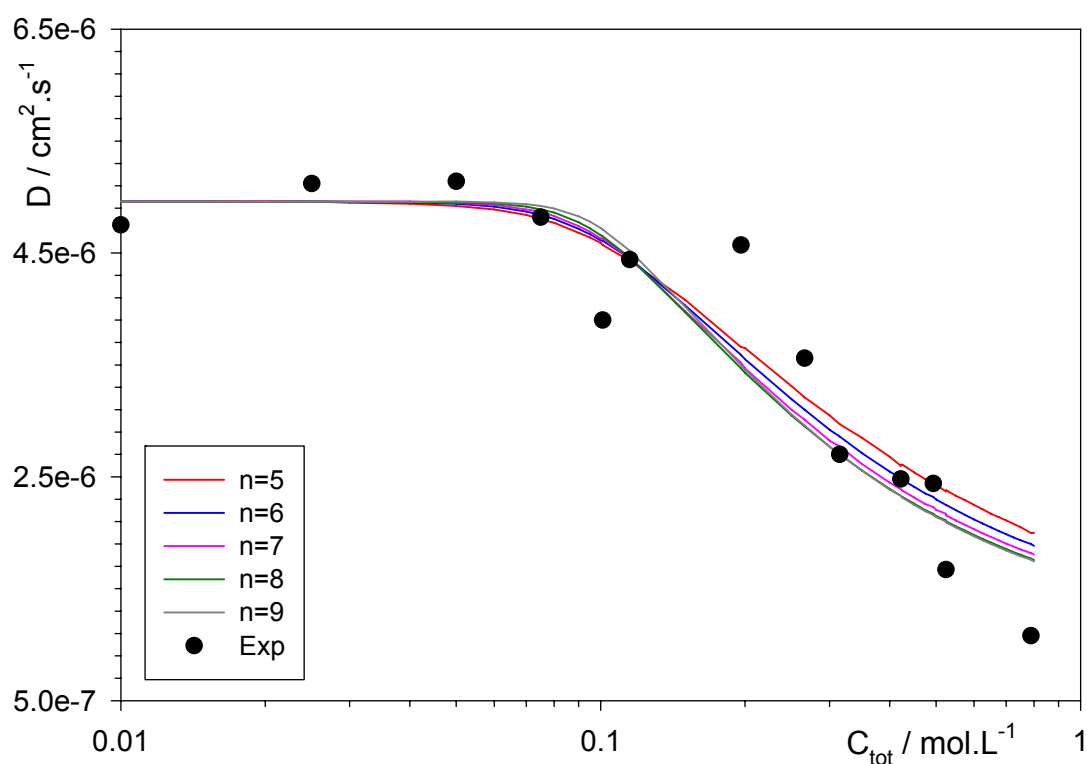

**Fig. S6** Experimental and calculated (for  $n=5$  to  $9$ ) self- diffusion coefficients vs. the total malonamide concentration for the DMDBTDMA/ $C_{12}D_{26}$ / $H_2O$  system
